# Supplementary material for: Activin A forms a non-signaling complex with ACVR1 and type II Activin/BMP receptors via its finger 2 tip loop
Source: eLife. 2020 Jun 9;9:e54582. doi: 10.7554/eLife.54582 (PMC7326492; doi:10.7554/eLife.54582)
Supplement: Figure 1—source data 1. [file elife-54582-fig1-data1.xlsx]

## Sheet: Sheet1
Figure 1A
Log [SD208]	Activin A				Log [SD208]	TGFB1				log [SD208]	BMP6
	Percent	SEM	N			Percent	SEM	N			Percent	SEM	N
5.08053e-12	101.125	5.81029	4		5.08053e-12	91.0095	5.9129	4		5.08053e-12	101.769	4.32415	4
1.52416e-11	92.0033	6.78198	4		1.52416e-11	99.0536	3.91048	4		1.52416e-11	101.302	5.94105	4
4.57247e-11	102.478	5.45638	4		4.57247e-11	85.9621	5.48433	4		4.57247e-11	103.735	4.50198	4
1.37174e-10	94.1274	3.78566	4		1.37174e-10	89.7476	5.65115	4		1.37174e-10	109.5	5.58034	4
4.11523e-10	99.7085	8.9984	4		4.11523e-10	89.1167	3.26185	4		4.11523e-10	102.895	3.87631	4
1.23457e-09	77.3219	0.715249	4		1.23457e-09	60.4101	2.99453	4		1.23457e-09	108.038	3.63434	4
3.7037e-09	48.0841	3.60868	4		3.7037e-09	6.62461	3.28843	4		3.7037e-09	99.9638	4.89326	4
1.11111e-08	6.76801	0.550837	4		1.11111e-08	-8.20189	2.59494	4		1.11111e-08	105.811	2.13595	4
3.33333e-08	-0.749688	0.289555	4		3.33333e-08	-6.30915	2.03627	4		3.33333e-08	89.3373	2.7836	4
1e-07	-0.104123	0.340702	4		1e-07	-11.8297	1.80988	4		1e-07	84.2083	6.28558	4
Log [MAB222]	Activin A				Log [MAB222]	TGFB1				log [MAB222]	BMP6
	Percent	SEM	N			Percent	SEM	N			Percent	SEM	N
1.01611e-11	98.4351	3.0082	4		1.01611e-11	108.2	3.53373	4		1.01611e-11	91.2296	5.82866	4
3.04832e-11	98.4742	7.13642	4		3.04832e-11	111.016	5.54333	4		3.04832e-11	98.736	4.9918	4
9.14495e-11	90.4538	5.75036	4		9.14495e-11	117.041	6.06864	4		9.14495e-11	95.0989	7.30813	4
2.74348e-10	84.9765	6.22603	4		2.74348e-10	118.717	8.17895	4		2.74348e-10	100	2.04714	4
8.23045e-10	78.795	2.77224	4		8.23045e-10	116.043	4.93271	4		8.23045e-10	96.2425	6.94995	4
2.46914e-09	79.7731	3.16819	4		2.46914e-09	115.865	3.08761	4		2.46914e-09	100.43	2.28992	4
7.40741e-09	57.7856	3.35803	4		7.40741e-09	111.39	5.71275	4		7.40741e-09	97.2485	4.49918	4
2.22222e-08	59.3897	4.55831	4		2.22222e-08	117.825	3.51083	4		2.22222e-08	90.5417	4.1777	4
6.66667e-08	50.7825	1.75094	4		6.66667e-08	111.355	2.23284	4		6.66667e-08	95.4686	6.54831	4
2e-07	36.1111	5.22925	4		2e-07	111.569	8.87015	4		2e-07	92.7773	6.19212	4
6e-07	16.1189	0.208432	4		6e-07	109.055	7.8578	4		6e-07	92.4334	2.64742	4
Figure 1D
		MAB222+SD208				Activin A+MAB222+SD208
Membrane/Coordinate		Intensity	SEM	N		Intensity	SEM	N
CREB (S133)		1348	148	2		2327.22	219.473	2
EGF R (Y1086)		2479	92	2		2701.44	347.92	2
eNOS (S1177)
ERK1/2 (T202/Y204, T185/Y187)		4751.5	101.5	2		4758.61	428.832	2
Fgr (Y412)		3182.5	733.5	2		3415.99	351.46	2
GSK-3α/β (S21/S9)		114210	764	2		112192	442.991	2
GSK-3β (S9)		6391.5	330.5	2		6042.07	250.826	2
HSP27 (S78/S82)
JNK1/2/3 (T183/Y185, T221/Y223)		9152.5	360.5	2		6520.97	210.876	2
Lck (Y394)		7080.5	162.5	2		6249.92	146.147	2
Lyn (Y397)		14128.5	237.5	2		11753.4	167.892	2
MSK1/2 (S376/S360)		3921.5	265.5	2		4248.87	114.288	2
p38α (T180/Y182)		18926.5	1294.5	2		15538.6	151.204	2
PDGF Rβ (Y751)		5952.5	190.5	2		5260.27	137.55	2
PLC-γ1 (Y783)		9535	907	2		7857.53	504.686	2
Src (Y419)		18132.5	203.5	2		15894.1	43.49	2
STAT2 (Y689)		3299	269	2		3220.28	228.575	2
STAT5a/b (Y694/Y699)		62087	855	2		49022.8	1681.44	2
WNK1 (T60)		43669.5	3974.5	2		41332.7	627.065	2
Yes (Y426)		4505	221	2		4485.03	145.135	2
β-Catenin		13723	1343	2		13865.2	152.721	2
Akt 1/2/3 (T308)		20030.9	4005.12	2		20432.8	2616.39	2
Akt 1/2/3 (S473)		17719.4	1067.96	2		18198.4	2686.22	2
Chk-2 (T68)		39476.3	2653.46	2		43656	3240.85	2
c-Jun (S63)		29671.7	2738.3	2		24401.6	6276.62	2
p53 (S392)		10129.7	648.518	2		8902.12	36.4302	2
p70 S6 Kinase (T389)		22334.4	901.986	2		15683.2	1671.74	2
p70 S6 Kinase (T421/S424)		16914.5	5230.57	2		13692.2	655.237	2
PRAS40 (T246)		25732.9	844.187	2		24145.6	818.161	2
PYK2 (Y402)		36153.2	1377.11	2		28597.7	1289.22	2
RSK1/2 (S221/S227)		11970.3	485.726	2		14506.8	288.911	2
RSK1/2/3 (S380/S386/S337)		11434.7	569.508	2		12729.3	987.663	2
STAT1 (Y701)		14917.5	71.0559	2		18192.8	262.095	2
STAT3 (Y705)		8459.9	246.044	2		7000.67	471.568	2
STAT3 (S727)		72894.4	1837.38	2		60183.7	476.628	2
STAT6 (Y641)		7201.57	432.169	2		7034.57	663.333	2
HSP60		103659	550.418	2		96757.5	2826.88	2
