# Supplementary material for: Activin A forms a non-signaling complex with ACVR1 and type II Activin/BMP receptors via its finger 2 tip loop
Source: eLife. 2020 Jun 9;9:e54582. doi: 10.7554/eLife.54582 (PMC7326492; doi:10.7554/eLife.54582)
Supplement: Figure 4—source data 1. [file elife-54582-fig4-data1.xlsx]

## Sheet: Sheet1
Figure 4A
	[Ligand], log M	BMP7			Activin A			ActivinA.Nod.F2TL			ActivinA.delta.D406
	2e-07	452	958	412	15399	16111	17305	13214	12950	11244	15231	13824	18947
	6.67e-08	536	580	478	17771	20056	16411	15323	12570	15397	14549	15207	19829
	2.22e-08	328	438	368	17583	17245	20634	12046	14565	15149	18411	13500	21768
	7.41e-09	324	720	546	14203	16123	14587	13388	12478	11812	11810	12412	17781
	2.47e-09	306	624	508	14427	13760	13728	10524	11450	10236	13962	11276	15643
	8.23e-10	650	706	882	14449	11598	11150	8646	7170	7008	9030	8342	11848
	2.74e-10	714	620	586	10638	9816	8968	5420	5452	6316	7230	7422	8784
	9.14e-11	570	644	688	5854	5684	7212	2494	2550	2866	5172	4232	5420
	3.05e-11	920	576	734	1482	1604	2564	1478	1782	2096	2610	2254	3100
	1.02e-11	958	1148	750	850	1192	944	1148	1138	1000	1114	1148	1344
	3.39e-12	652	888	690	1570	728	616	926	1010	796	910	950	814
	1.13e-13	672	1038	684	836	538	778	704	600	898	552	460	782
Figure 4B	ACVR1:ACVR2A
	[Ligand], log M	BMP7			Activin A
	2e-07	2.03872	1.83526	2.24752	1.91088	2.01347	2.03519
	6.66667e-08	2.20399	2.15548	2.34901	1.97366	2.09776	2.15176
	2.22222e-08	2.15017	2.11397	2.26369	1.95634	2.19108	2.20979
	7.40741e-09	2.03911	1.92303	2.12357	1.87091	1.92991	1.98538
	2.46914e-09	1.69828	1.79078	1.76467	1.92087	1.96244	1.93471
	8.23045e-10	1.30836	1.46773	1.572	1.60259	1.66988	1.76247
	2.74348e-10	1.17414	1.25971	1.31451	1.33992	1.43031	1.576
	9.14495e-11	1.06166	1.11445	1.10898	1.1066	1.16292	1.18626
	3.04832e-11	0.934258	1.09074	1.1584	0.981567	1.08326	1.00814
	1.01611e-11	0.886751	1.06214	1.02385	1.0195	0.994985	1.07578
	3.38702e-12	0.991506	1.00677	1.05581	1.05179	1.13295	1.02658
	1e-13	1	1	1	1	1	1
	ACVR1:ACVR2A
	[Ligand], log M	Activin A			ActA.Nod.F2TL
	2e-07	1.91088	2.01347	2.03519	1.25436	1.14801	1.20758
	6.66667e-08	1.97366	2.09776	2.15176	1.35353	1.29463	1.33892
	2.22222e-08	1.95634	2.19108	2.20979	1.32512	1.28779	1.3089
	7.40741e-09	1.87091	1.92991	1.98538	1.20311	1.15224	1.19931
	2.46914e-09	1.92087	1.96244	1.93471	1.17064	1.15468	1.12099
	8.23045e-10	1.60259	1.66988	1.76247	1.05319	1.00266	1.0944
	2.74348e-10	1.33992	1.43031	1.576	0.946426	0.97792	0.978849
	9.14495e-11	1.1066	1.16292	1.18626	0.908262	0.991261	0.985435
	3.04832e-11	0.981567	1.08326	1.00814	0.917043	0.967113	0.950395
	1.01611e-11	1.0195	0.994985	1.07578	0.911808	0.921771	0.953857
	3.38702e-12	1.05179	1.13295	1.02658	0.913159	0.8831	1.01085
	1e-13	1	1	1	1	1	1
	ACVR1B:BMPR2
	[Ligand], log M	Activin A			ActA.Nod.F2TL
	6e-08	2.68118	3.18279	2.95199	2.89298	3.25744	3.19092
	2e-08	3.05337	3.38492	3.23914	3.252	3.53852	3.84811
	6.67e-09	3.39788	4.06461	3.73325	3.54361	3.8973	4.00851
	2.22e-09	3.55821	4.03014	3.80417	3.72489	3.81032	4.07598
	7.41e-10	2.49435	2.885	2.70967	3.26323	3.33075	3.3923
	2.47e-10	1.60429	1.77875	1.70152	2.01106	2.18436	2.12322
	8.23e-11	1.36963	1.8175	1.58756	1.47762	1.57577	1.59847
	2.74e-11	1.37351	1.60585	1.4887	1.39277	1.49299	1.52114
	9.14e-12	1.18914	1.56197	1.40555	1.33944	1.36581	1.48613
	3.05e-12	1.16931	1.35679	1.27306	1.20239	1.24874	1.28268
	1.02e-12	1.00405	1.20936	1.1107	1.04151	1.09543	1.22332
	1e-13	1	1	1	1	1	1
	TGFBR1:ACVR2B
	[Ligand], log M	Activin A			ActA.Nod.F2TL
	2e-08	1.42716	1.66981	2.15364	1.43528	1.77908	2.27502
	6.67e-09	1.34167	1.7505	2.0341	1.25083	1.7726	2.09667
	2.22e-09	1.36931	1.7359	2.18229	1.34803	1.80199	2.27577
	7.41e-10	1.50149	1.82766	2.16932	1.43166	1.89022	2.26507
	2.47e-10	1.30667	1.67968	2.02248	1.39595	1.77788	2.36844
	8.23e-11	1.10246	1.44945	1.72657	1.07256	1.32512	1.6305
	2.74e-11	1.0207	1.29113	1.6069	0.972725	1.36264	1.39941
	9.14e-12	1.00002	1.27194	1.55636	0.766426	0.927667	1.25912
	3.05e-12	0.883999	1.47392	1.4327	0.796263	0.859554	1.05395
	1.02e-12	0.792098	0.991914	1.34262	0.76296	0.9566	1.11912
	1e-13	1	1	1	1	1	1
