# Supplementary material for: Activin A forms a non-signaling complex with ACVR1 and type II Activin/BMP receptors via its finger 2 tip loop
Source: eLife. 2020 Jun 9;9:e54582. doi: 10.7554/eLife.54582 (PMC7326492; doi:10.7554/eLife.54582)
Supplement: Figure 5—source data 1. [file elife-54582-fig5-data1.xlsx]

## Sheet: Sheet1
Figure 5A
[Ligand], log M	BMP7			ActA.Nod.F2TL+ BMP7			ActA.Nod.F2TL + BMP7 + REGN2476			ActivinA + BMP7			ActivinA + BMP7 + REGN2476
4e-07	14955	15431	15889
1.33e-07	14219	15939	15521
4.44e-08	14449	15485	15125
1.48e-08	14589	14473	15255
4.94e-09	13002	12442	13382
1.65e-09	11204	9478	10680
5.49e-10	7766	8180	7652
1.83e-10	6790	6426	6268
6.1e-11	5870	6150	6322
1e-12	6032	6106	6104
3.27e-07				7917.49	8440.94	7803.6	14812.2	14137.6	14996.1	5890	5388	5792	10192	9882	10226
1.09e-07				8822.03	9003.82	9757.24	14387.3	14264.6	14724.6	5626	5686	5594	12452	11524	12296
3.64e-08				11025.4	11283.8	11356.1	14426.7	14378.5	14433.3	6028	5994	6280	13600	13346	12616
1.21e-08				12816.9	12046	13022.8	14934.8	13905.4	15145.1	7352	7248	7252	14439	13870	13722
4.04e-09				13971.1	13721.5	14275.6	13550.6	15136.3	14601.9	8040	8094	8710	13954	14721	13538
1.35e-09				14593.1	12665.8	14231.8	14474.9	14996.1	14523.1	9500	10308	11298	14799	14429	14365
4.49e-10				13798.1	13357.9	14148.5	14409.2	15188.9	15061.8	11696	12312	12716	14437	14155	14421
1.5e-10				13942.7	13163	14365.4	14343.5	15090.3	14996.1	14415	14167	14737	14052	14431	15009
4.99e-11				13990.9	13517.8	14446.4	15068.4	14647.9	14345.7	13468	14641	14965	15009	14273	14717
1e-12				14755.2	14615.1	15324.7	15046.5	15101.3	15322.5	15013	14667	15055	15487	15181	15299
Figure 5B
[Ligand], log M	ActivinA + BMP7			ActA.Nod.F2TL+ BMP7			ActivinA + BMP7 + H4H10442
3.27e-07	5890	5388	5792	7917.49	8440.94	7803.6	6826	6810	6488
1.09e-07	5626	5686	5594	8822.03	9003.82	9757.24	10036	8508	8670
3.64e-08	6028	5994	6280	11025.4	11283.8	11356.1	12148	11520	11172
1.21e-08	7352	7248	7252	12816.9	12046	13022.8	13466	13182	13350
4.04e-09	8040	8094	8710	13971.1	13721.5	14275.6	14387	13854	14345
1.35e-09	9500	10308	11298	14593.1	12665.8	14231.8	14865	13934	13948
4.49e-10	11696	12312	12716	13798.1	13357.9	14148.5	14641	14601	14549
1.5e-10	14415	14167	14737	13942.7	13163	14365.4	14983	14987	15665
4.99e-11	13468	14641	14965	13990.9	13517.8	14446.4	14961	14493	14299
1e-12	15013	14667	15055	14755.2	14615.1	15324.7	14961	15543	15287
