# Supplementary material for: Activin A forms a non-signaling complex with ACVR1 and type II Activin/BMP receptors via its finger 2 tip loop
Source: eLife. 2020 Jun 9;9:e54582. doi: 10.7554/eLife.54582 (PMC7326492; doi:10.7554/eLife.54582)
Supplement: Figure 6—source data 1. [file elife-54582-fig6-data1.xlsx]

## Sheet: Sheet1
Figure 6A
[Follistatin 288], log M	Fs288 + 10nM Activin A			Fs288 + 10nM ActA.Nod.F2TL
8e-07	18165	14839	13596	11668	14689	15689
2.66667e-07	7312	4964	4880	4800	6656	7840
8.88889e-08	18253	16535	16053	22936	24947	31262
2.96296e-08	63844	53616	54190	42312	42230	54376
9.87654e-09	66738	52960	53158	42545	39615	55977
3.29218e-09	67202	56563	51883	38275	42044	49210
1.09739e-09	61935	57798	54388	42156	44285	54704
3.65798e-10	65097	51001	53616	36668	44784	47123
1.21933e-10	62199	54464	49134	42256	43815	50398
4.06442e-11	57994	53016	47723	36846	33937	44744
1.35481e-11	62833	58046	57770	41180	38441	51719
4.51602e-12	67252	65129	61516	44221	46604	48379
Figure 6B
[Fs315], log M	Fs315 + 10nM Activin A			Fs315 + 10nM ActA.Nod.F2TL
8e-07	3812	2340	2152	2268	2082	2644
2.66667e-07	3410	2242	2258	1558	2514	2248
8.88889e-08	4024	1940	2234	2052	2032	3080
2.96296e-08	3916	2548	2672	4012	6228	4832
9.87654e-09	51747	40190	41274	30850	33475	35978
3.29218e-09	57782	53416	50182	32371	39189	41474
1.09739e-09	67764	53212	54262	37563	36820	39325
3.65798e-10	60828	50316	54530	39013	41742	40822
1.21933e-10	67812	50990	48075	34143	44231	41372
4.06442e-11	56604	51103	59109	35854	41168	46062
1.35481e-11	59305	53744	51591	37973	42202	41074
4.51602e-12	65351	57578	57824	38391	39461	42082
Figure 6C
[FSTL3], log M	FSTL3 + 10nM Activin A			FSTL3 + 10nM ActA.Nod.F2TL
8e-07	7508	5230	5652	13788	15283	19885
2.66667e-07	6414	5410	5238	22590	19707	24729
8.88889e-08	10068	5522	5318	29900	31667	37186
2.96296e-08	16969	12764	13236	41626	43587	47459
9.87654e-09	53002	44798	38665	40738	44425	54114
3.29218e-09	67076	60368	54933	39029	44357	49754
1.09739e-09	65701	60716	53504	39977	45202	50166
3.65798e-10	68477	59881	52081	40536	47509	51029
1.21933e-10	66157	56127	54981	38087	39431	49142
4.06442e-11	67887	59687	55763	44473	50462	49054
1.35481e-11	70638	58473	57774	48747	45354	47173
4.51602e-12	66920	60026	61875	44463	40548	50834
