# Supplementary material for: Activin A forms a non-signaling complex with ACVR1 and type II Activin/BMP receptors via its finger 2 tip loop
Source: eLife journal article supplement (doi:10.7554/elife.54582), 2020-06-09
Supplement: supp [file elife-54582-supp-v1.zip]

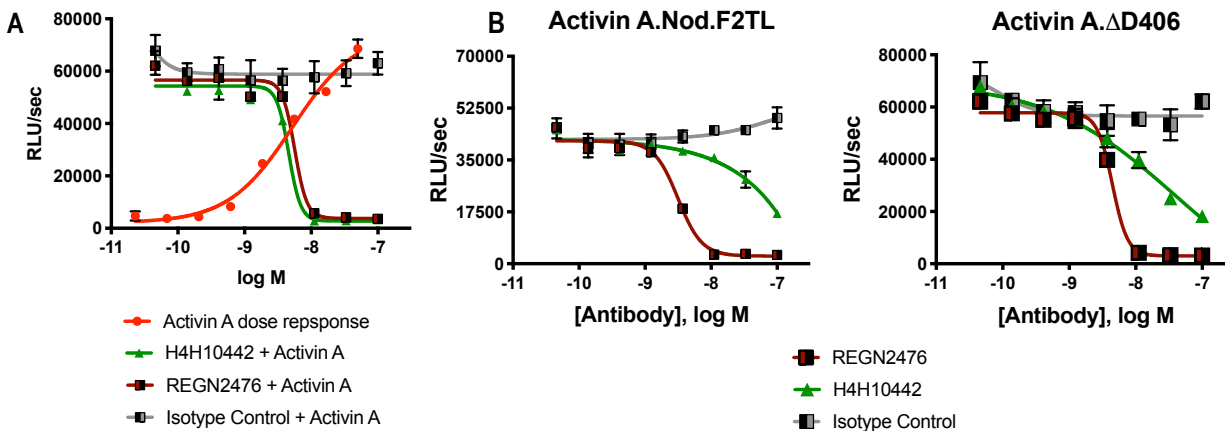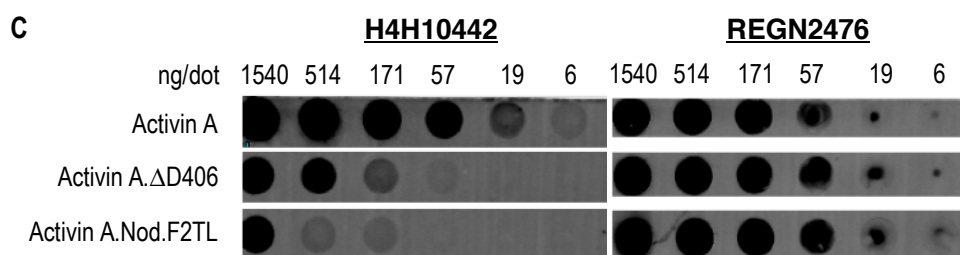

**D**

| Capture Surface | Dimer Captured (RU) | Reagent Tested | 20nM Activin A bound (RU) | $k_a$ (1/Ms) | $k_d$ (1/s) | KD (M)    | $t'_{1/2}$ (min) |
|-----------------|---------------------|----------------|---------------------------|--------------|-------------|-----------|------------------|
| H4H10442        | 181                 | Activin A      | 41                        | 1.44E+07     | 5.00E-05    | <3.48E-12 | >231             |
| REGN2476        | 109                 |                | 25                        | 2.30E+07     | 5.00E-05    | 3.97E-12  | 77               |
