# Supplementary material for: Activin A forms a non-signaling complex with ACVR1 and type II Activin/BMP receptors via its finger 2 tip loop
Source: eLife journal article supplement (doi:10.7554/elife.54582), 2020-06-09
Supplement: supp [file elife-54582-supp-v1.zip]

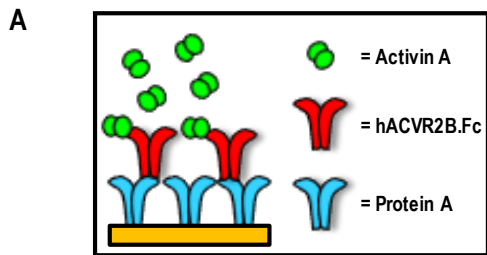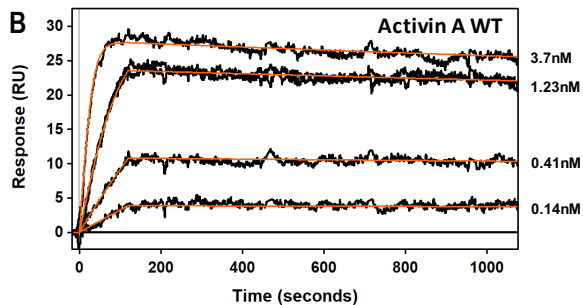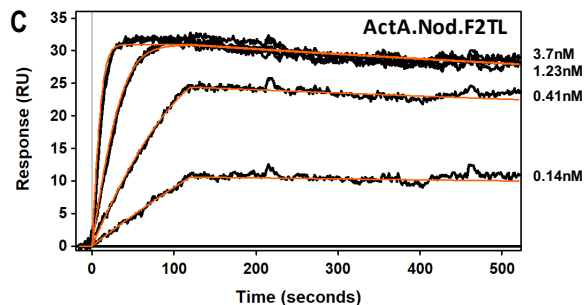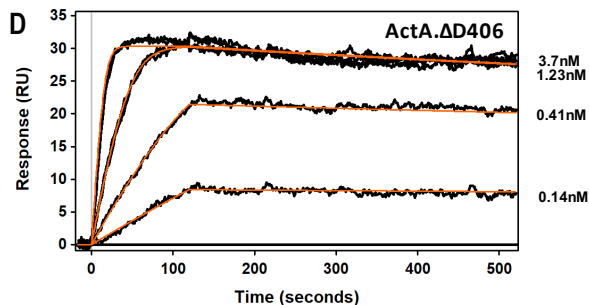

**E**

| Capture Surface | Dimer Captured (RU) | Reagent Tested | 100nM Reagent Bound (RU) | $k_a$ (1/Ms) | $k_d$ (1/s) | KD (M)   | $t_{1/2}$ (min) |
|-----------------|---------------------|----------------|--------------------------|--------------|-------------|----------|-----------------|
| ACVR2B.Fc       | 118 ± 1             | ActivinA WT    | 30                       | 1.89E+07     | 8.46E-05    | 4.49E-12 | 137             |
|                 | 117 ± 0.9           | ActA.Nod.F2TL  | 33                       | 5.29E+07     | 2.70E-04    | 5.11E-12 | 43              |
|                 | 116 ± 0.8           | ActA.ΔD406     | 33                       | 5.50E+07     | 2.54E-04    | 4.62E-12 | 46              |
