# Supplementary material for: Activin A forms a non-signaling complex with ACVR1 and type II Activin/BMP receptors via its finger 2 tip loop
Source: eLife journal article supplement (doi:10.7554/elife.54582), 2020-06-09
Supplement: supp [file elife-54582-supp-v1.zip]

|                         |                                                    |                   |                |
|-------------------------|----------------------------------------------------|-------------------|----------------|
|                         |                                                    | D406              |                |
|                         |                                                    | ↓                 |                |
| Primates                | HUMAN                                              | MSMLYYDDGQNI      | IKKDIQNMIVEECG |
|                         | Macaca fascicularis (Crab-eating Macaque)          | MSMLYYDDGQNI      | IKKDIQNMIVEECG |
|                         | Pan troglodytes (Chimpanzee)                       | MSMLYYDDGQNI      | IKKDIQNMIVEECG |
|                         | Felis catus (Cat)                                  | MSMLYYDDGQNI      | IKKDIQNMIVEECG |
|                         | Canis lupus familiaris (Dog)                       | MSMLYYDDGQNI      | IKKDIQNMIVEECG |
|                         | Ursus maritimus (Polar Bear)                       | MSMLYYDDGQNI      | IKKDIQNMIVEECG |
| Carnivores & Herbivores | Ailuropoda melanoleuca (Giant Panda)               | MSMLYYDDGQNI      | IKKDIQNMIVEECG |
|                         | Loxodonta africana (African elephant)              | MSMLYYDDGQNI      | IKKDIQNMIVEECG |
|                         | Equus caballus (Horse)                             | MSMLYYDDGQNI      | IKKDIQNMIVEECG |
|                         | Bos taurus (Bovine)                                | MSMLYYDDGQNI      | IKKDIQNMIVEECG |
|                         | Ovis aries (Sheep)                                 | MSMLYYDDGQNI      | IKKDIQNMIVEECG |
|                         | PIG (Sus scrofa)                                   | MSMLYYDDGQNI      | IKKDIQNMIVEECG |
|                         | Mus musculus (Mouse)                               | MSMLYYDDGQNI      | IKKDIQNMIVEECG |
| Rodents                 | Rattus norvegicus (Rat)                            | MSMLYYDDGQNI      | IKKDIQNMIVEECG |
|                         | Oryctolagus cuniculus (Rabbit)                     | MSMLYYDDGQNI      | IKKDIQNMIVEECG |
|                         | Myotis lucifugus (Little brown bat)                | MSMLYYDDGQNI      | IKKDIQNMIVEECG |
| Aquatic Mammals         | Tursiops truncatus (Atlantic bottle-nosed dolphin) | MSMLYYDDGQNI      | IKKDIQNMIVEECG |
|                         | Physeter catodon (Sperm Whale)                     | MSMLYYDDGQNI      | IKKDIQNMIVEECG |
|                         | Ornithorhynchus anatinus (Duckbill platypus)       | MSMLYYDDGQNI      | IKKDIQNMIVEECG |
|                         | Ophiophagus hannah (King Cobra)                    | MSMLYYDDGQNI      | IKKDIQNMIVEECG |
| Reptiles                | Pelodiscus sinensis (Chinese softshell turtle)     | MSMLYYDDGQNI      | IKKDIQNMIVEECG |
|                         | Anolis carolinensis (Green Anole)                  | MSMLYYDDGQNI      | IKKDIQNMIVEECG |
|                         | CHICK (Gallus gallus)                              | MSMLYYDDGQNI      | IKKDIQNMIVEECG |
| Birds                   | Anas platyrhynchos (Mallard)                       | MSMLYYDDGQNI      | IKKDIQNMIVEECG |
|                         | Meleagris gallopavo (Wild Turkey)                  | MSMLYYDDGQNI      | IKKDIQNMIVEECG |
| Amphibians              | Xenopus laevis (African clawed frog)               | MSMLYYDDGQNI      | IKKDIQNMIVEECG |
|                         | Latimeria chalumnae (West Indian ocean coelacanth) | MSMLYYDDGQNI      | IKKDIQNMIVEECG |
|                         | Danio rerio (Zebrafish)                            | MSMLYYNEEQKI      | IKKDIQNMIVEECG |
| Fish                    | Ictalurus punctatus (Channel catfish)              | MSMLYYNEEQKI      | IKKDIQNMIVEECG |
|                         | Austrofundulus limnaeus (Killifish)                | MSMLYYNEEQKI      | IKKDIQNMIVEECG |
|                         | Salmo salar (Atlantic salmon)                      | MSMLYYNEEQKI      | IKKDIQNMIVEECG |
|                         | Scleropages formosus (Asian Arowana)               | MSMLYYNEEQKI      | IKKDIQNMIVEECG |
| Insects                 | Bactrocera dorsalis (Oriental fruit fly)           | LKLVFMESNNTATQKTF | PNMVIESCG      |
|                         | Bactrocera latifrons (Malaysian fruit fly)         | LKLVFMESNNTATQKTF | PNMVIESCG      |
