# Supplementary material for: Activin A forms a non-signaling complex with ACVR1 and type II Activin/BMP receptors via its finger 2 tip loop
Source: eLife journal article supplement (doi:10.7554/elife.54582), 2020-06-09
Supplement: supp [file elife-54582-supp-v1.zip]

|         | Finger One                                          | Pre helix region | H3 helix | Post helix region                        | Tip loop       | Type II      |
|---------|-----------------------------------------------------|------------------|----------|------------------------------------------|----------------|--------------|
| hinnB8A | IGCKKQFFNFSKDKDGVNDWIIAPPFHYGHHNYCEGEEPSHLAGTSGSSLS | STSTVIVNHYRMGHSF | ANLKS    | CCVPTKLR                                 | SMLYYDGGQNLIKK | DIQNINVEEGCG |
| hBMP2   | IGKRRIPLFDSDSDGVNDWIIAPPFHYGHHNYCEGEEPSHLAGTSGSSLS  | STSTVIVNHYRMGHSF | ANLKS    | CCVPTKLR                                 | SMLYYDGGQNLIKK | DIQNINVEEGCG |
| hBMP4   | IGARRVLYFDSDSDGVNDWIIAPPFHYGHHNYCEGEEPSHLAGTSGSSLS  | STSTVIVNHYRMGHSF | ANLKS    | CCVPTKLR                                 | SMLYYDGGQNLIKK | DIQNINVEEGCG |
| hBMP6   | IGRRISLYFDSDSDGVNDWIIAPPFHYGHHNYCEGEEPSHLAGTSGSSLS  | STSTVIVNHYRMGHSF | ANLKS    | CCVPTKLR                                 | SMLYYDGGQNLIKK | DIQNINVEEGCG |
| hBMP5   | IGPKRIEIVFDSDSDGVNDWIIAPPFHYGHHNYCEGEEPSHLAGTSGSSLS | STSTVIVNHYRMGHSF | ANLKS    | CCVPTKLR                                 | SMLYYDGGQNLIKK | DIQNINVEEGCG |
| hBMP7   | IGKKELIVFDSDSDGVNDWIIAPPFHYGHHNYCEGEEPSHLAGTSGSSLS  | STSTVIVNHYRMGHSF | ANLKS    | CCVPTKLR                                 | SMLYYDGGQNLIKK | DIQNINVEEGCG |
| hBMP8a  | IGRRRIEIVFDSDSDGVNDWIIAPPFHYGHHNYCEGEEPSHLAGTSGSSLS | STSTVIVNHYRMGHSF | ANLKS    | CCVPTKLR                                 | SMLYYDGGQNLIKK | DIQNINVEEGCG |
| hBMP8b  | IGRRRIEIVFDSDSDGVNDWIIAPPFHYGHHNYCEGEEPSHLAGTSGSSLS | STSTVIVNHYRMGHSF | ANLKS    | CCVPTKLR                                 | SMLYYDGGQNLIKK | DIQNINVEEGCG |
| hBMP9   | IGKTSIVFDSDSDGVNDWIIAPPFHYGHHNYCEGEEPSHLAGTSGSSLS   | STSTVIVNHYRMGHSF | ANLKS    | CCVPTKLR                                 | SMLYYDGGQNLIKK | DIQNINVEEGCG |
| hBMP10  | IGKTSIVFDSDSDGVNDWIIAPPFHYGHHNYCEGEEPSHLAGTSGSSLS   | STSTVIVNHYRMGHSF | ANLKS    | CCVPTKLR                                 | SMLYYDGGQNLIKK | DIQNINVEEGCG |
| hBMP15  | IGSLTFPFLDSDSDGVNDWIIAPPFHYGHHNYCEGEEPSHLAGTSGSSLS  | STSTVIVNHYRMGHSF | ANLKS    | CCVPTKLR                                 | SMLYYDGGQNLIKK | DIQNINVEEGCG |
| hGDF1   | IGARRIVFDSDSDGVNDWIIAPPFHYGHHNYCEGEEPSHLAGTSGSSLS   | STSTVIVNHYRMGHSF | ANLKS    | CCVPTKLR                                 | SMLYYDGGQNLIKK | DIQNINVEEGCG |
| hGDF5   | IGSKAKLVNFKKELGVDWIIAPLLENAYHCEGEEPSHLAGTSGSSLS     | STSTVIVNHYRMGHSF | ANLKS    | CCVPTKLR                                 | SMLYYDGGQNLIKK | DIQNINVEEGCG |
| hGDF6   | IGSKKPLKLVNFKKELGVDWIIAPLLENAYHCEGEEPSHLAGTSGSSLS   | STSTVIVNHYRMGHSF | ANLKS    | CCVPTKLR                                 | SMLYYDGGQNLIKK | DIQNINVEEGCG |
| hGDF7   | IGSKKPLKLVNFKKELGVDWIIAPLLENAYHCEGEEPSHLAGTSGSSLS   | STSTVIVNHYRMGHSF | ANLKS    | CCVPTKLR                                 | SMLYYDGGQNLIKK | DIQNINVEEGCG |
| hGDF9   | IGELIDFRLSDSDGVNDWIIAPLLENAYHCEGEEPSHLAGTSGSSLS     | STSTVIVNHYRMGHSF | ANLKS    | CCVPTKLR                                 | SMLYYDGGQNLIKK | DIQNINVEEGCG |
| hGDF10  | IGKRRIVFDSDSDGVNDWIIAPPFHYGHHNYCEGEEPSHLAGTSGSSLS   | STSTVIVNHYRMGHSF | ANLKS    | CCVPTKLR                                 | SMLYYDGGQNLIKK | DIQNINVEEGCG |
| hMIS    | IGALREIVFDSDSDGVNDWIIAPPFHYGHHNYCEGEEPSHLAGTSGSSLS  | STSTVIVNHYRMGHSF | ANLKS    | CCVPTKLR                                 | SMLYYDGGQNLIKK | DIQNINVEEGCG |
| hNodal  | IGRRVFKFDSDSDGVNDWIIAPPFHYGHHNYCEGEEPSHLAGTSGSSLS   | STSTVIVNHYRMGHSF | ANLKS    | CCVPTKLR                                 | SMLYYDGGQNLIKK | DIQNINVEEGCG |
| hNHB    | IGCKQOIFDSDSDGVNDWIIAPPFHYGHHNYCEGEEPSHLAGTSGSSLS   | STSTVIVNHYRMGHSF | ANLKS    | CCVPTKLR                                 | SMLYYDGGQNLIKK | DIQNINVEEGCG |
| hNHB8   | IGCKQOIFDSDSDGVNDWIIAPPFHYGHHNYCEGEEPSHLAGTSGSSLS   | STSTVIVNHYRMGHSF | ANLKS    | CCVPTKLR                                 | SMLYYDGGQNLIKK | DIQNINVEEGCG |
| hNHB9   | IGCKQOIFDSDSDGVNDWIIAPPFHYGHHNYCEGEEPSHLAGTSGSSLS   | STSTVIVNHYRMGHSF | ANLKS    | CCVPTKLR                                 | SMLYYDGGQNLIKK | DIQNINVEEGCG |
| hGDF3   | IGRRRIEIVFDSDSDGVNDWIIAPPFHYGHHNYCEGEEPSHLAGTSGSSLS | STSTVIVNHYRMGHSF | ANLKS    | CCVPTKLR                                 | SMLYYDGGQNLIKK | DIQNINVEEGCG |
| hGDF3a  | IGRRRIEIVFDSDSDGVNDWIIAPPFHYGHHNYCEGEEPSHLAGTSGSSLS | STSTVIVNHYRMGHSF | ANLKS    | CCVPTKLR                                 | SMLYYDGGQNLIKK | DIQNINVEEGCG |
| hGDF3b  | IGRRRIEIVFDSDSDGVNDWIIAPPFHYGHHNYCEGEEPSHLAGTSGSSLS | STSTVIVNHYRMGHSF | ANLKS    | CCVPTKLR                                 | SMLYYDGGQNLIKK | DIQNINVEEGCG |
| hGDF11  | IGCYPTFLDSDSDGVNDWIIAPPFHYGHHNYCEGEEPSHLAGTSGSSLS   | STSTVIVNHYRMGHSF | ANLKS    | CCVPTKLR                                 | SMLYYDGGQNLIKK | DIQNINVEEGCG |
| hGDF15  | IGRLIVFLDSDSDGVNDWIIAPPFHYGHHNYCEGEEPSHLAGTSGSSLS   | STSTVIVNHYRMGHSF | ANLKS    | CCVPTKLR                                 | SMLYYDGGQNLIKK | DIQNINVEEGCG |
| hTGFB2  | IGCLPRIVFDSDSDGVNDWIIAPPFHYGHHNYCEGEEPSHLAGTSGSSLS  | STSTVIVNHYRMGHSF | ANLKS    | CCVPTKLR                                 | SMLYYDGGQNLIKK | DIQNINVEEGCG |
| hTGFB1  | IGCVKQIVFDSDSDGVNDWIIAPPFHYGHHNYCEGEEPSHLAGTSGSSLS  | STSTVIVNHYRMGHSF | ANLKS    | CCVPTKLR                                 | SMLYYDGGQNLIKK | DIQNINVEEGCG |
| hTGFB3  | IGCVKQIVFDSDSDGVNDWIIAPPFHYGHHNYCEGEEPSHLAGTSGSSLS  | STSTVIVNHYRMGHSF | ANLKS    | CCVPTKLR                                 | SMLYYDGGQNLIKK | DIQNINVEEGCG |
|         | C R L YDF GW DWIIAP GY A YC G C FFL                 |                  | HNHA Q L | P P P CCVPTKL PIS LY D NV K Y M VV C G C |                |              |
