# Supplementary figures and images for: Activin A forms a non-signaling complex with ACVR1 and type II Activin/BMP receptors via its finger 2 tip loop
Source: eLife journal article supplement (doi:10.7554/elife.54582), 2020-06-09

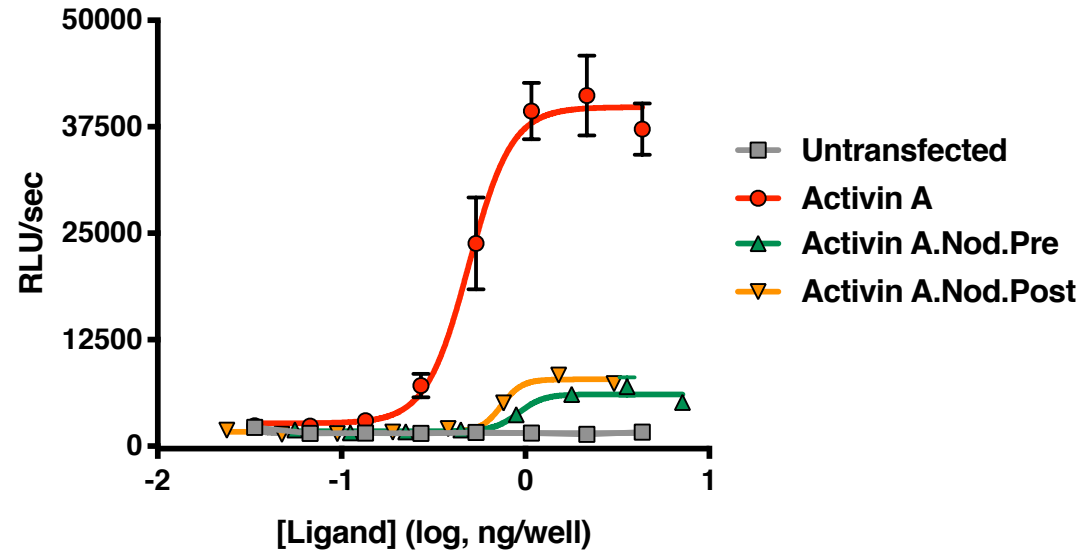

Supplement: supp [file elife-54582-supp-v1.zip]

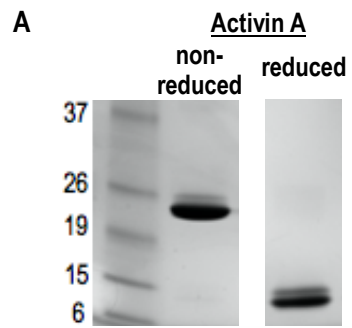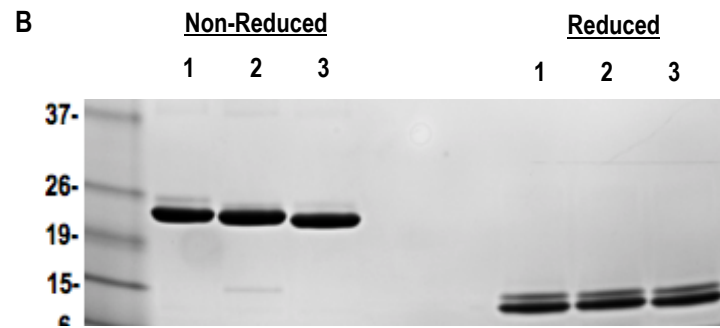

1: Activin A.GDF8.F2TL  
2: Activin A.Nod.F2TL  
3: Activin A.ΔD406

Supplement: supp [file elife-54582-supp-v1.zip]

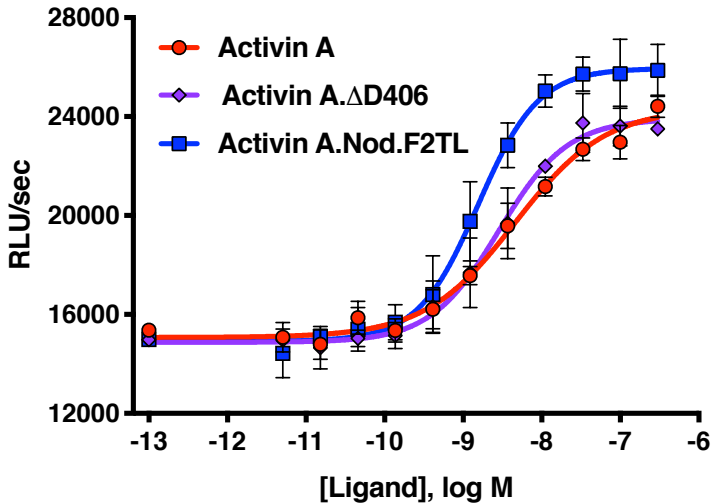

Supplement: supp [file elife-54582-supp-v1.zip]

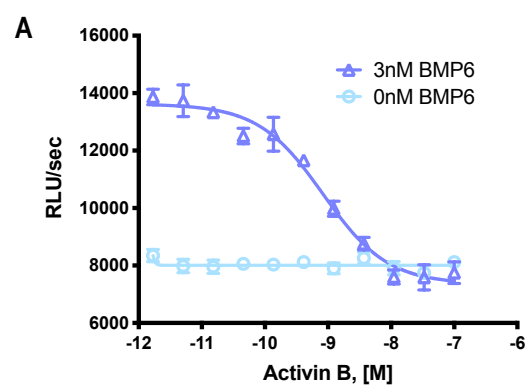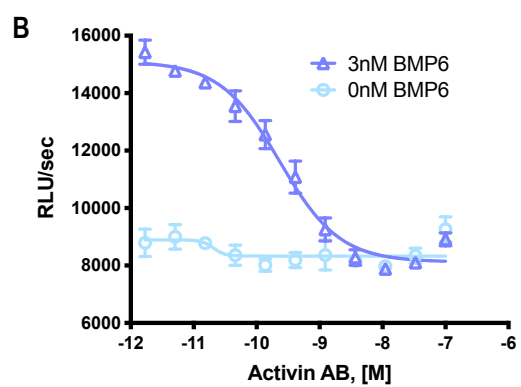

Supplement: supp [file elife-54582-supp-v1.zip]

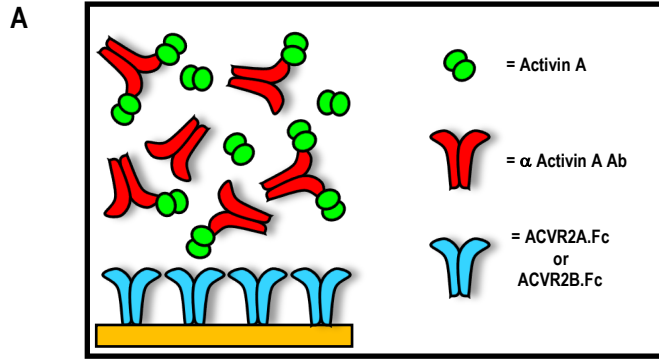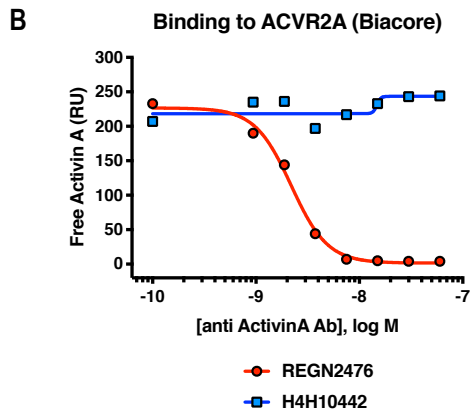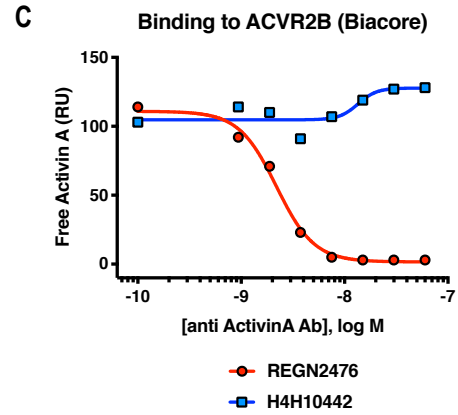

Supplement: supp [file elife-54582-supp-v1.zip]

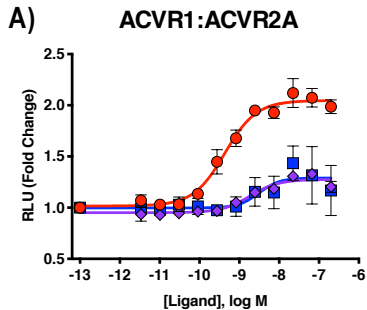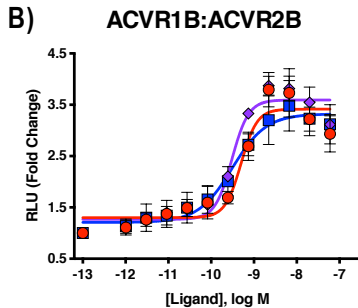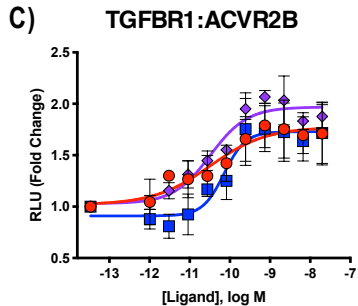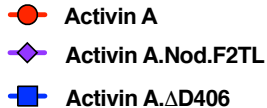

Supplement: supp [file elife-54582-supp-v1.zip]

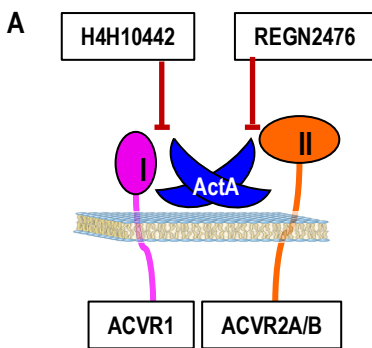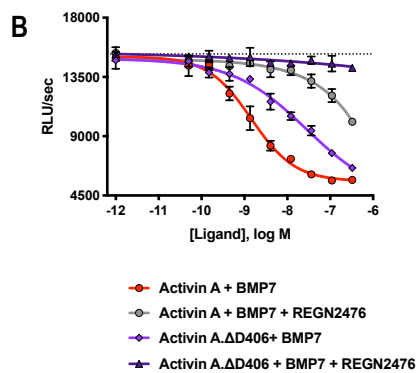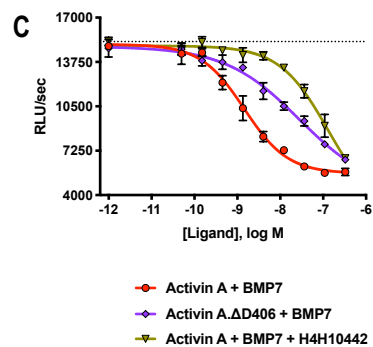

Supplement: supp [file elife-54582-supp-v1.zip]

**A**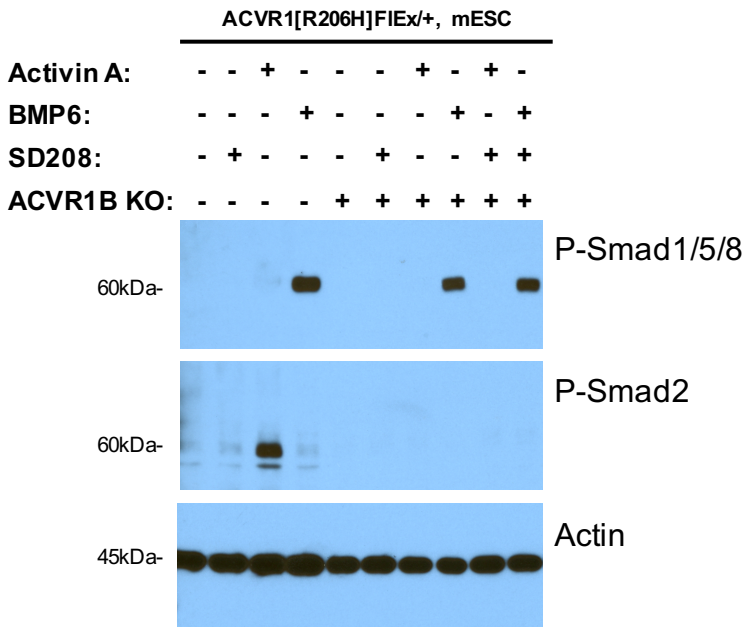**B**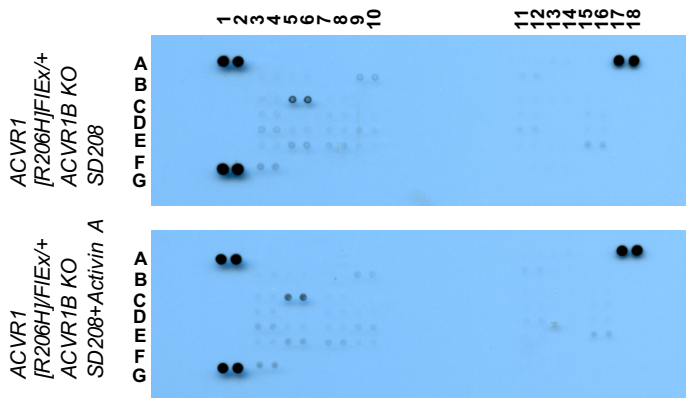

C

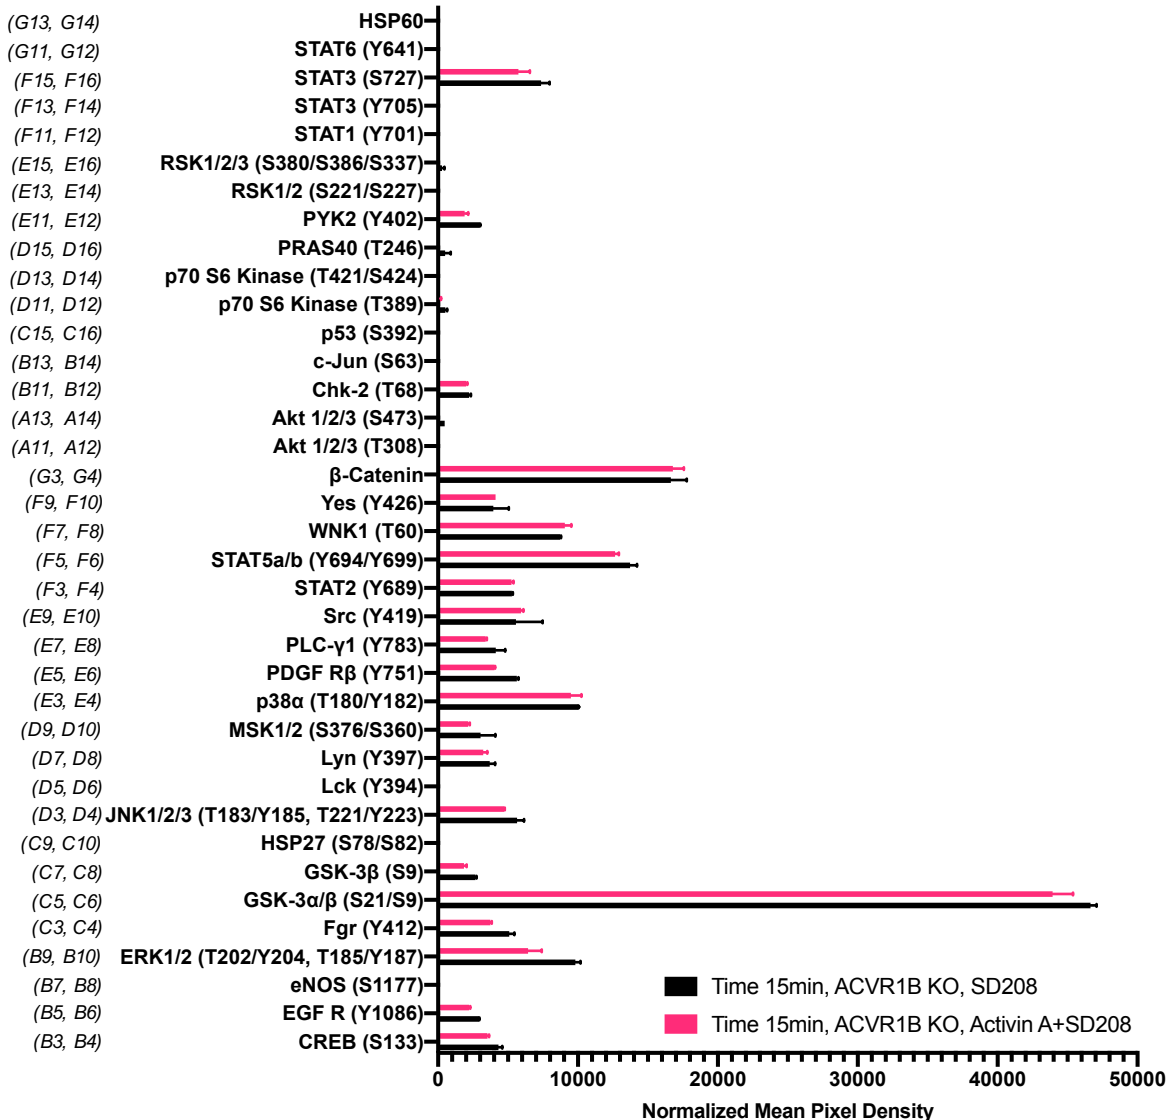

Supplement: supp [file elife-54582-supp-v1.zip]

A.

Activin A

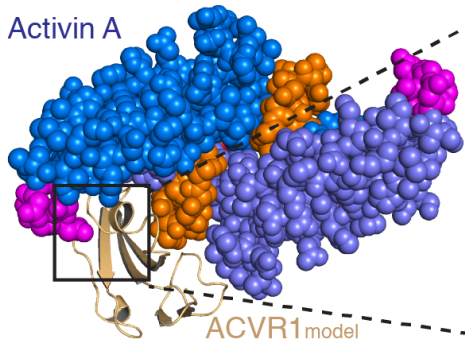

ACVR1 model

B. Wild type

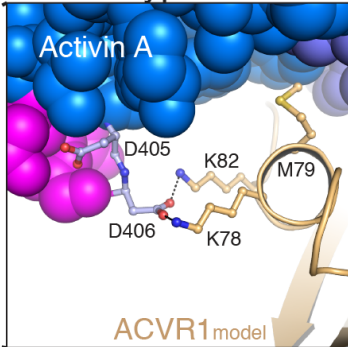

C. Activin A.Nod.F2TL

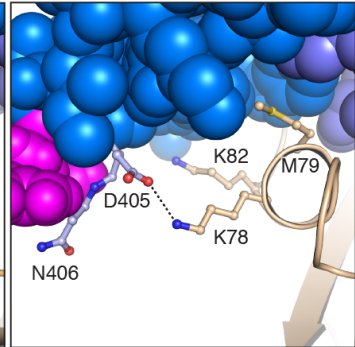

Supplement: supp [file elife-54582-supp-v1.zip]

**A**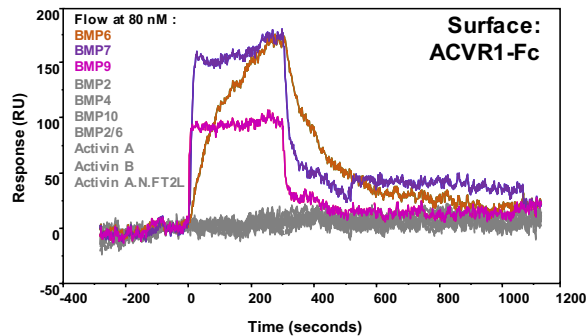**B**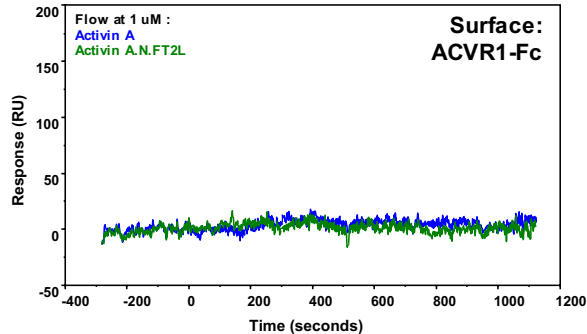**C**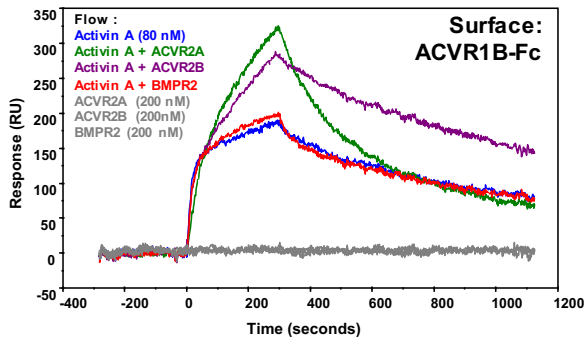**D**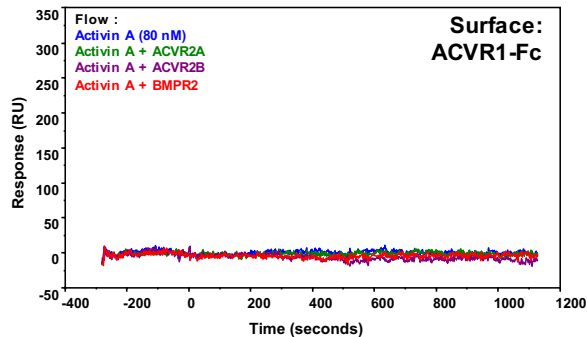

Supplement: supp [file elife-54582-supp-v1.zip]

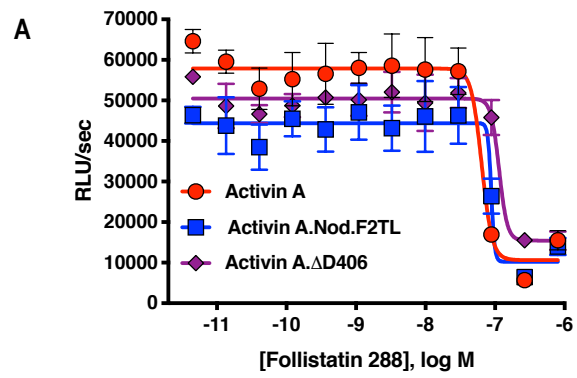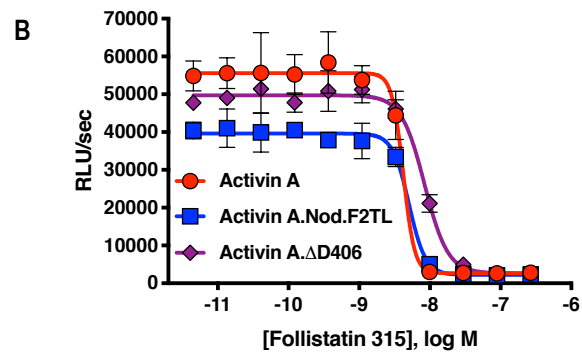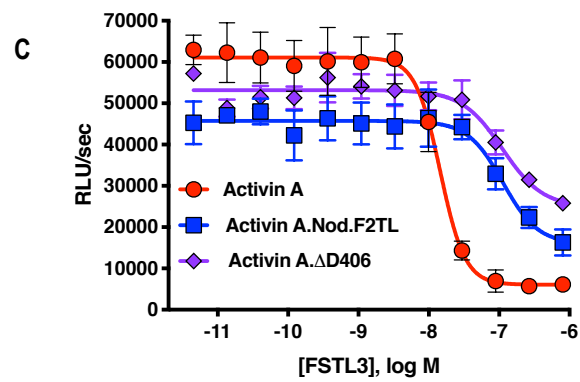

Supplement: supp [file elife-54582-supp-v1.zip]

ACVR1B:ACVR2B

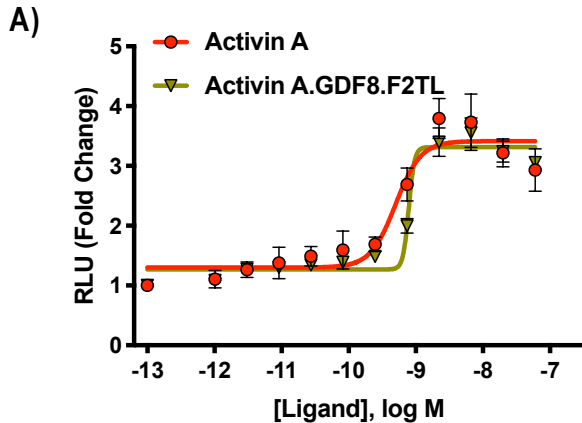

TGFR1:ACVR2B

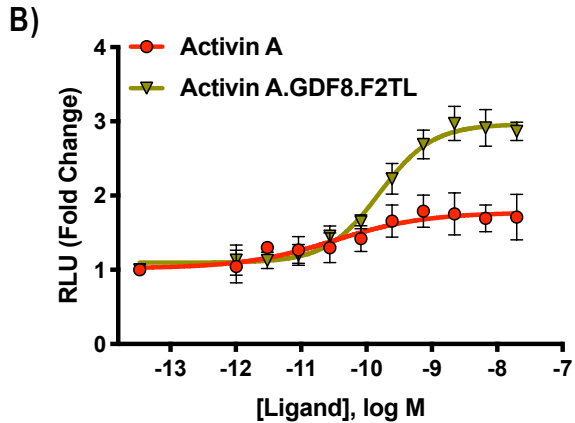

Supplement: supp [file elife-54582-supp-v1.zip]
